# Supplementary material
Source: Springer Nature journal article supplement (https://www.springermedizin.de/resource/supplementary/13058_2010_9487_MOESM9_ESM.pdf/9702268)

MCF-7

CTR

4  $\mu$ M8  $\mu$ M

24 h

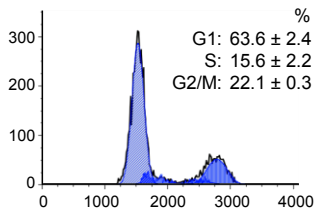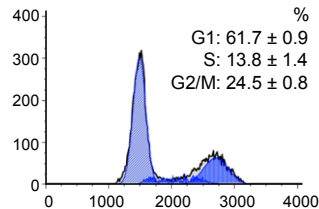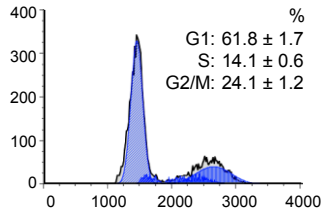

48 h

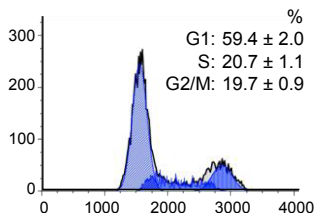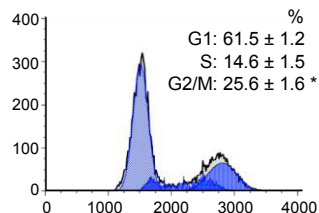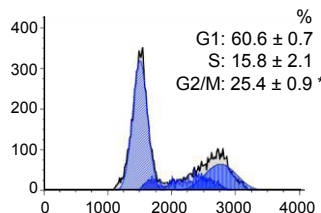

MDA-MB-231

CTR

4  $\mu$ M8  $\mu$ M

24 h

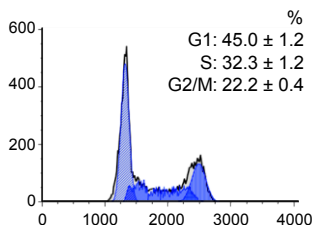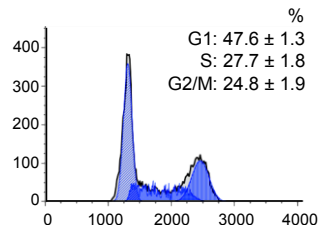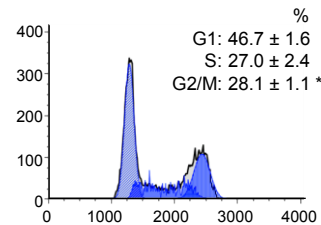

48 h

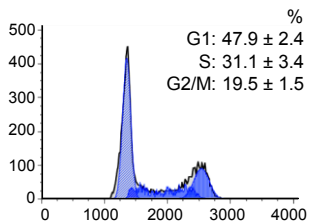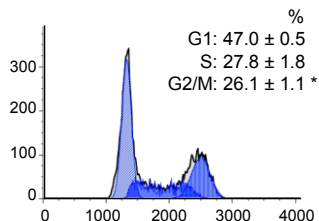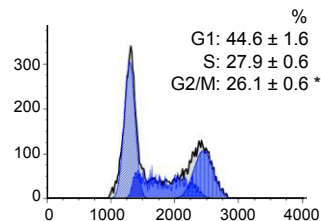

DNA content

Supplement: MOESM9 [file 9702268]
